# Supplementary material for: Machine Learning Developed a Programmed Cell Death Signature for Predicting Prognosis, Ecosystem, and Drug Sensitivity in Ovarian Cancer
Source: Hindawi journal article supplement (doi:10.1155/2023/7365503), 2023-01-01

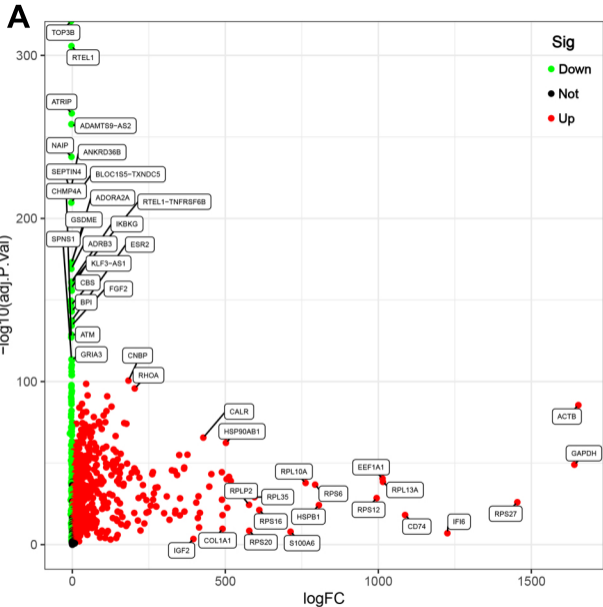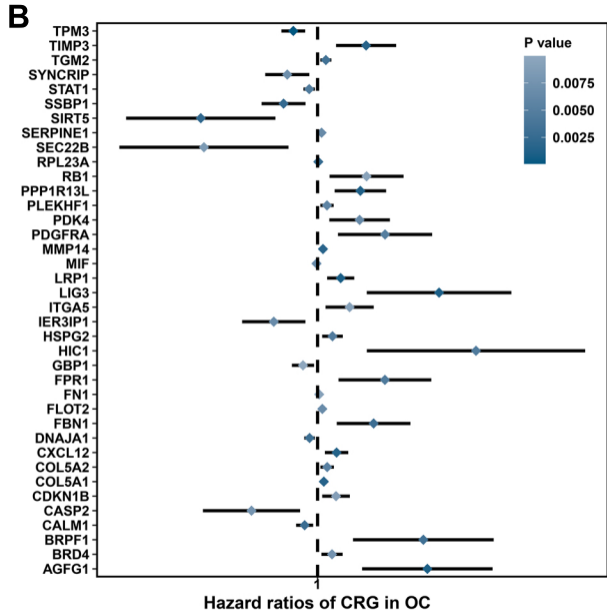

Supplement: f3 [file 7365503.f3.pdf]
